# Supplementary material for: Facile Synthesis Method of Zeolite NaY and Zeolite NaY-Supported Ni Catalyst with High Catalytic Activity for the Conversion of CO2 to CH4
Source: MDPI journal article supplement (doi:10.3390/chemengineering8020028), 2024-03-01
Supplement: s1 [file s1]

## Supplementary Materials

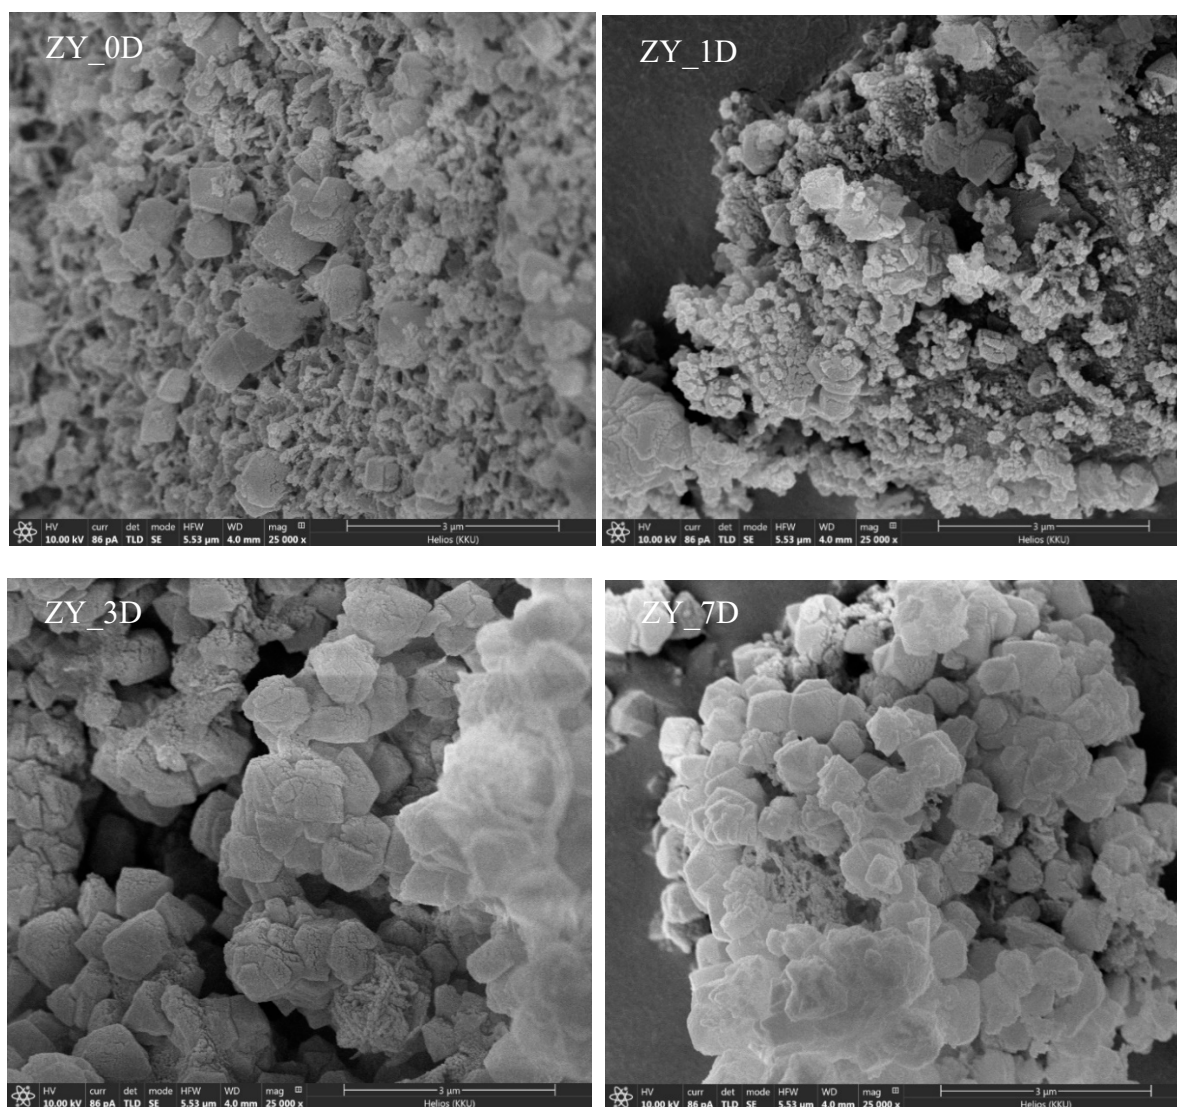

**Figure S1.** SEM images of zeolite NaY with different aging times (0, 1, 3 and 7 days).

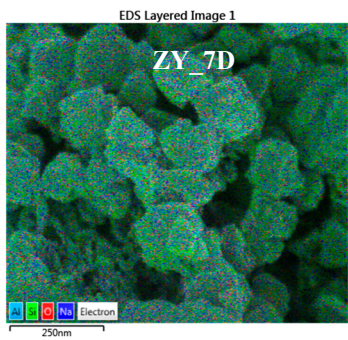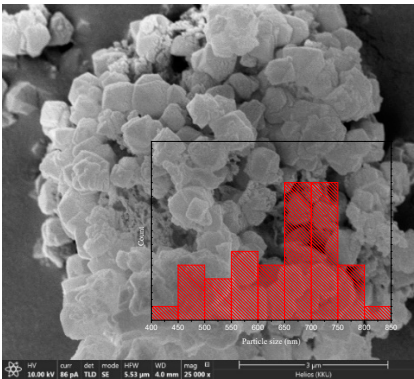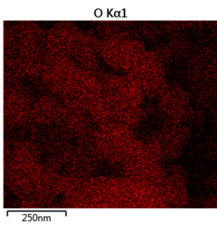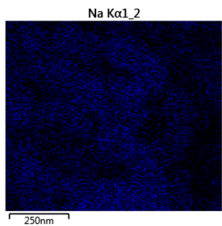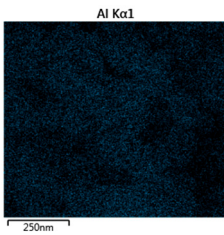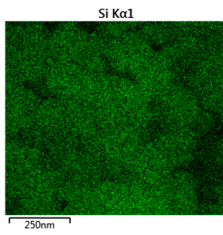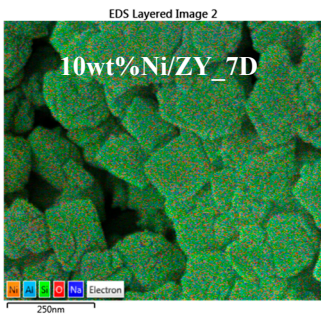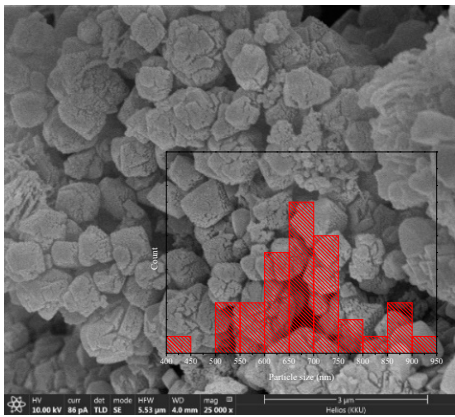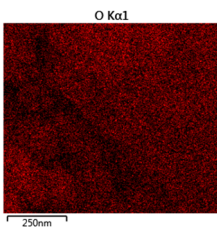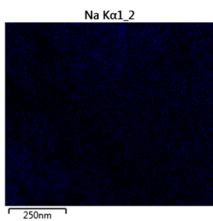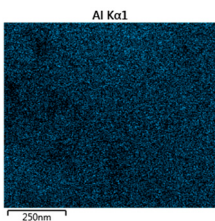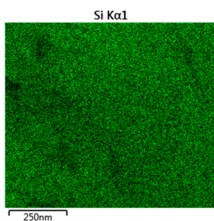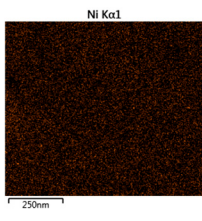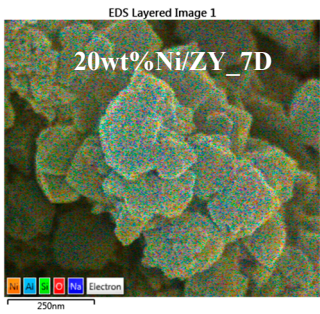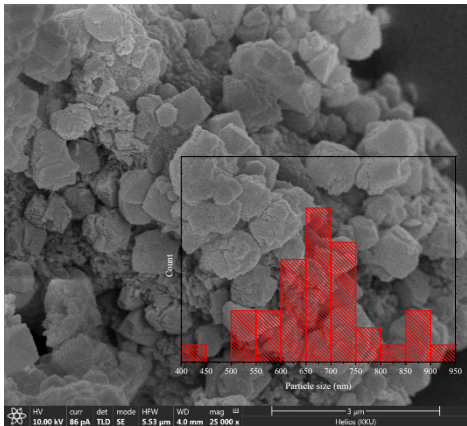



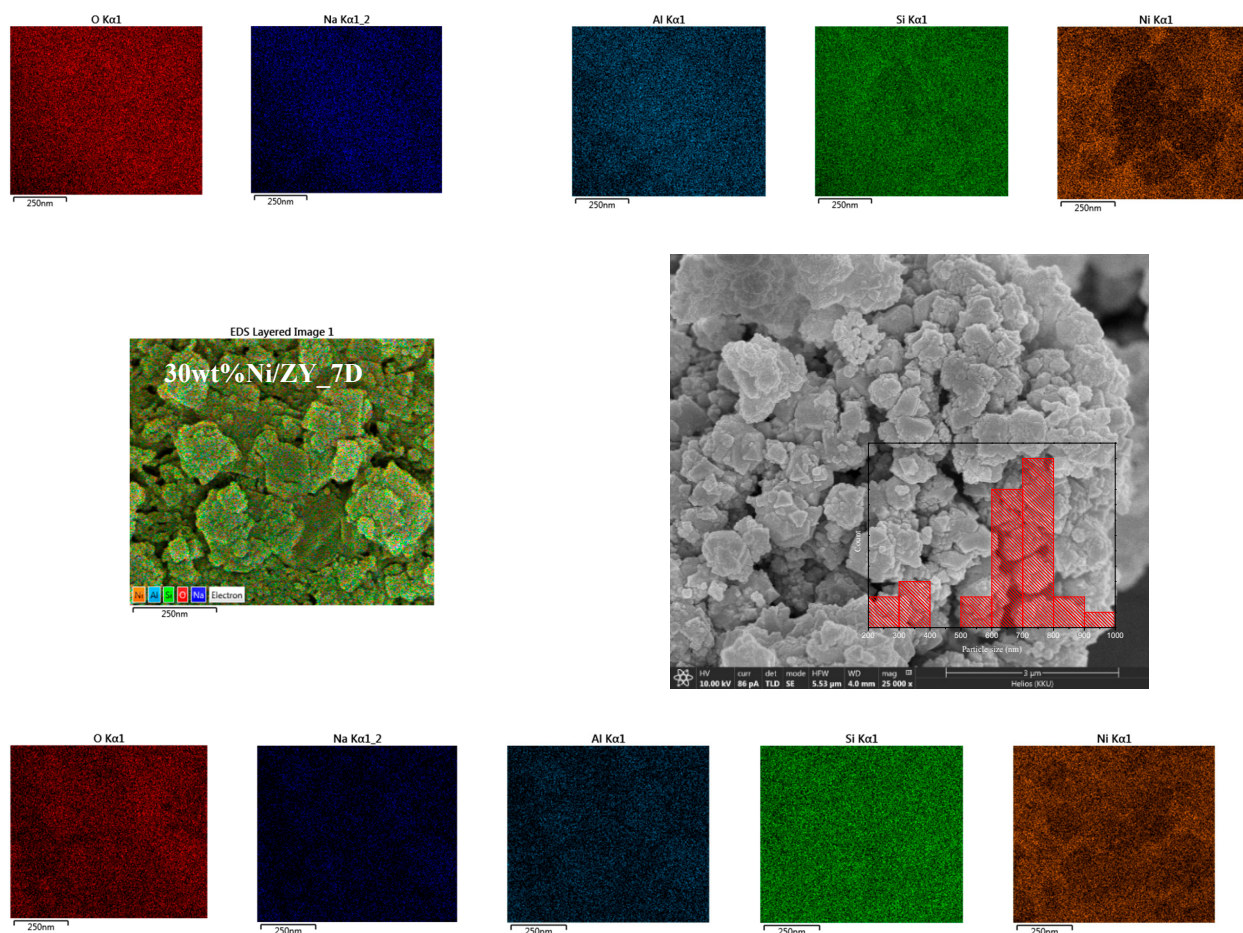

**Figure S2.** SEM images and elemental mapping of zeolite NaY support (ZY\_7D), with 10, 20 and 30wt%Ni/ZY\_7D catalysts.

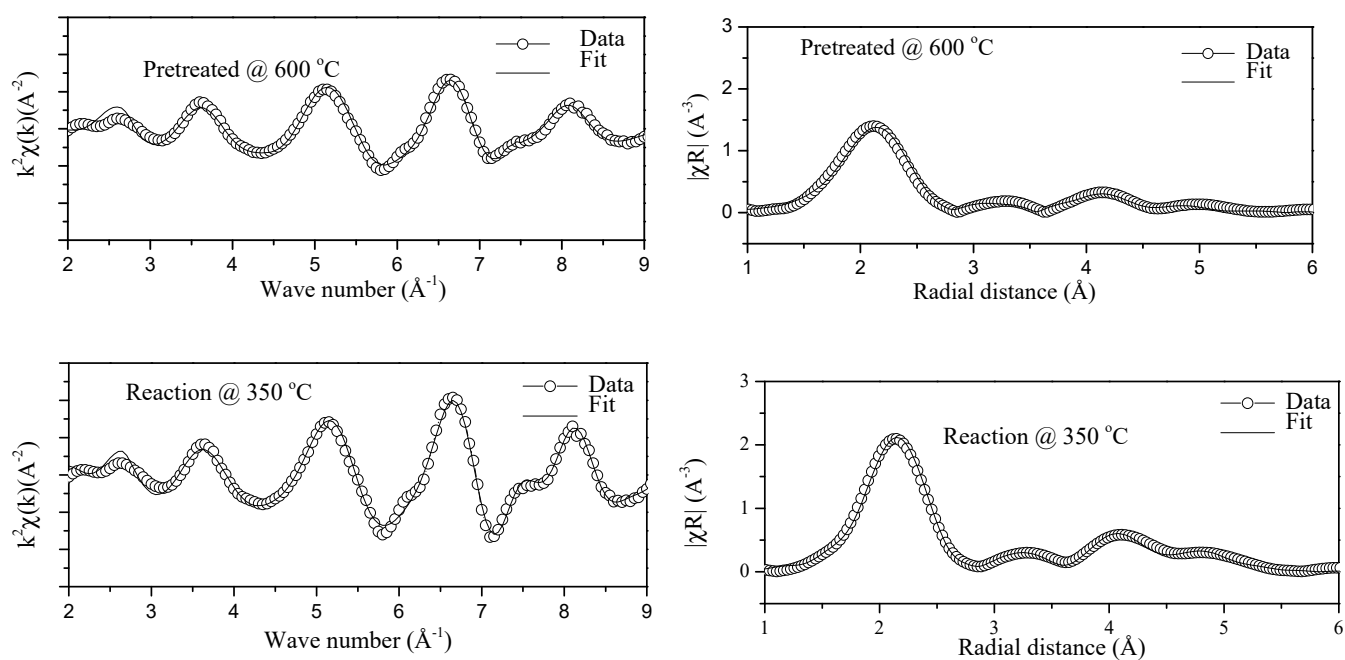

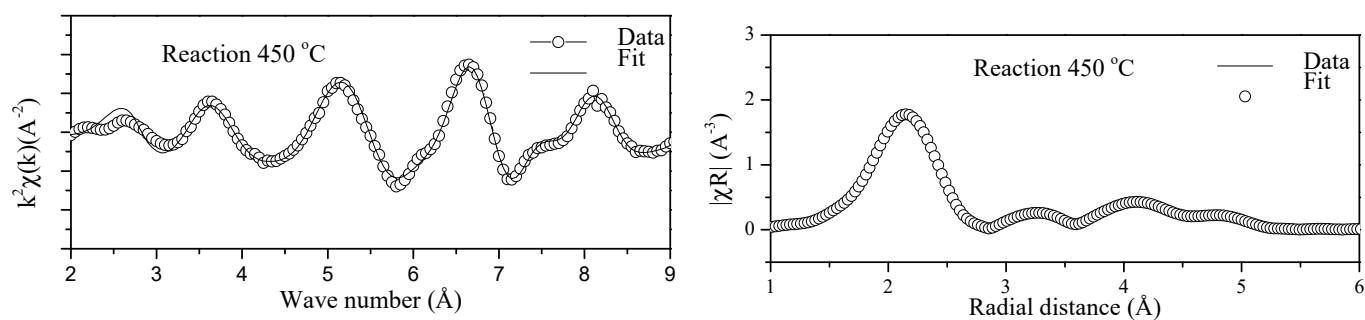

**Figure S3.** Ni K-edge EXAFS oscillation data with  $k^2\chi(k)$  (left hand side) and Fourier transformation data of Ni K-edge EXAFS for 30wt%Ni/ZY\_7D.

**Table S1.** The best fitting parameters obtained from 30wt%Ni/ZY\_7D during CO<sub>2</sub> methanation.

| Sample                          | Paths | N  | S <sub>0</sub> <sup>2</sup> | σ <sup>2</sup> | R (Å) |
|---------------------------------|-------|----|-----------------------------|----------------|-------|
| 30wt%Ni/ZY_7D pretreated@600 °C | Ni-Ni | 12 | 0.778                       | 0.01803        | 2.483 |
| 30wt%Ni/ZY_7D reaction@350 °C   | Ni-Ni | 12 | 0.705                       | 0.01264        | 2.481 |
| 30wt%Ni/ZY_7D reaction@450 °C   | Ni-Ni | 12 | 0.700                       | 0.01443        | 2.479 |
